# Supplementary material
Source: ML conference proceedings conference paper supplement (https://aclanthology.org/2022.acl-short.52)

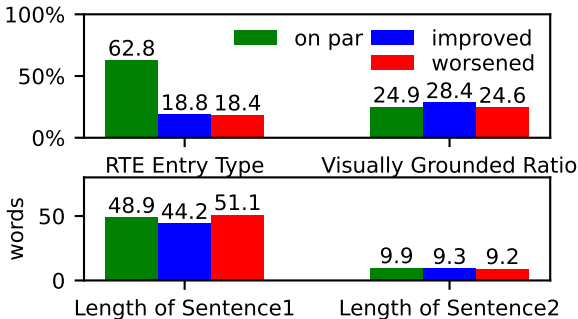

Supplement: software [file analysis.pdf › submission code/src/analysis/analysis.pdf]
